# Supplementary material
Source: PubMed Central journal article supplement (PMC7616938)
Supplement: EMS118382-supplement-Supplementary_Information.pdf [file EMS118382-supplement-Supplementary_Information.pdf]

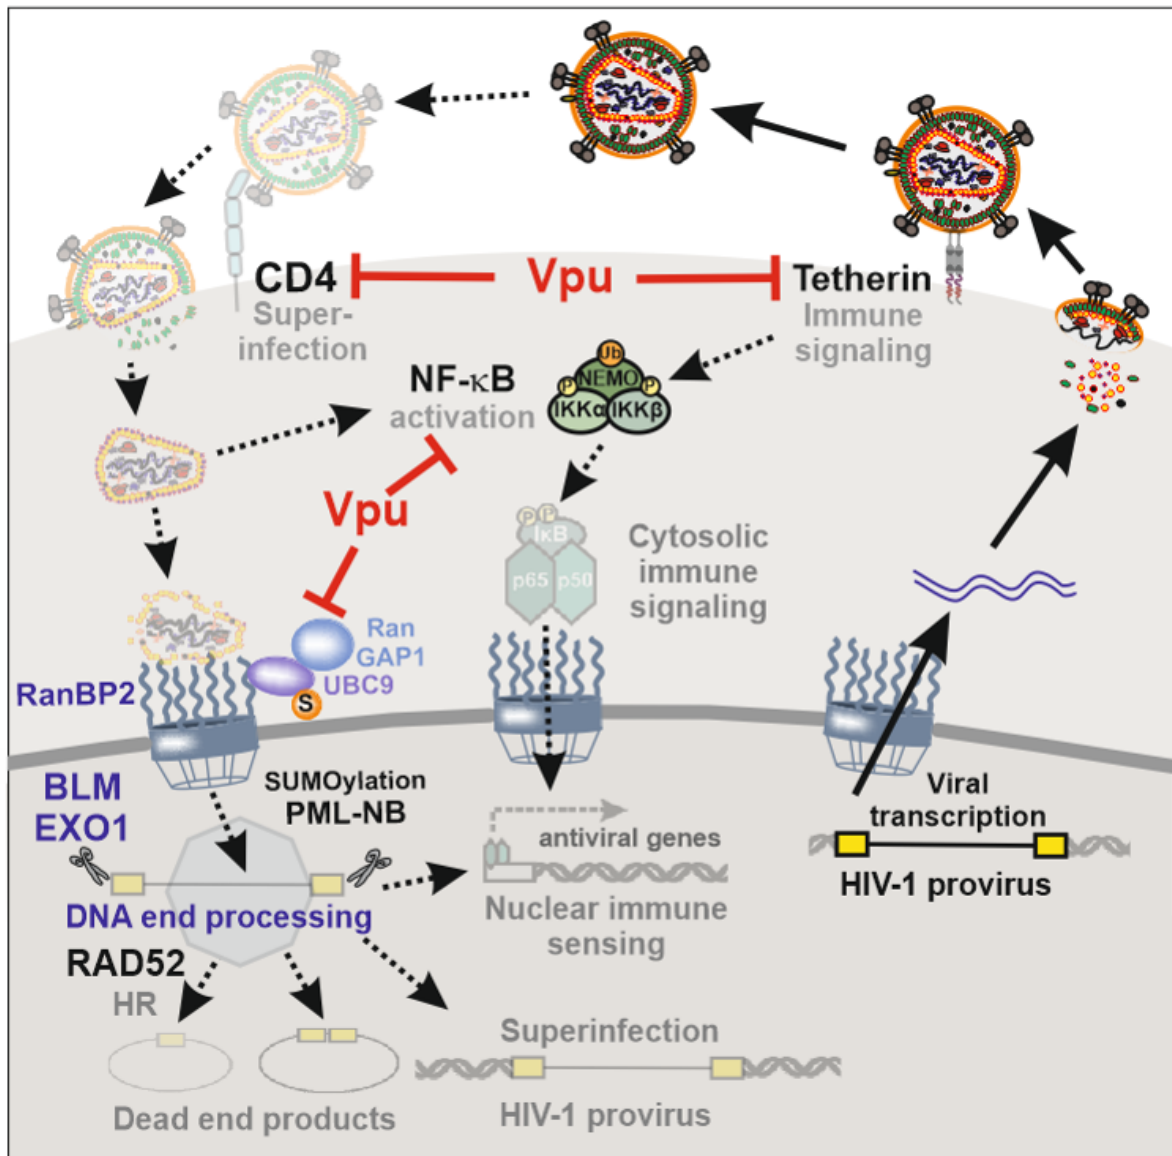

**Supplementary Figure 1. Schematic overview on the various mechanisms underlying Vpu-mediated suppression of HIV-1 superinfection and immune activation.** As outlined in the text, Vpu suppresses superinfection and immune activation by various mechanisms including degradation of the HIV-1 CD4 receptor, counteraction of the restriction factor and immune sensor tetherin, suppression of NF-κB activation and modulation of DNA repair by interfering with RanBP2/RanGAP1\*SUMO1/Ubc9 SUMO E3-ligase complexes at the nuclear pore.

Supplementary Table 1.

| Oligonucleotides         |                                                          |
|--------------------------|----------------------------------------------------------|
| IRES PmeI                | CGGTTTAAACCGGATCCCGGGAGTAC                               |
| eBFP SacII rev           | CGCCGCGGTTACTTGTACAG                                     |
| CH058 Env/Nef StuI for   | CGTTACACAGGCCTGTCCAAAGGTATCTTTTCAGC                      |
| CH058 SOE PmeI SacII rev | GATCCGCGGC GCGTTTAAACTCATCAGTTCTTGTAG                    |
| CH058 SOE PmeI SacII for | GAGTTTAAACCCGCGGATCTTAGCCACTTTTTAAAAGA<br>AAAGGGGGGACTGG |
| CH058 MluI LTR rev       | GCTTGTGACAGCGCTACGCGTTAGAATACTC                          |
| CH058 ENVdel for         | ACCTTCAGACCTGCAGGG                                       |
| CH058 ENVdel rev         | CCCATAATAGACTGTGACC                                      |
| CH058 Vpu BST- for       | TATTACTAATAATTGTGTGGACCATAG                              |
| CH058 Vpu BST- rev       | TTGCTAGCACTATTAAAGCTCCTATTG                              |
| CH058 Vpu NFκBα for      | TTAATTGAAAAATAAGTGAAAGAGC                                |
| CH058 Vpu NFκBα rev      | CCTGTCTATTTTCCTCTG                                       |
| CH058 Vpu STOP for       | ACATGTAATGTAATGATTAAATATAGCAATAGGAGC                     |
| CH058 Vpu STOP rev       | ATTACTTACTGCTTTGGTAG                                     |
| WITO SacII Vpu for       | CTCCGCGGATATGCAACCTTTAGAAATATTAGCAG                      |
| WITO NcoI Vpu_rev        | GTCCATGGCTATATATAGCGATAGGTGTCCTCATCATT<br>AACATC         |
