# Supplementary material
Source: PubMed Central journal article supplement (PMC7616938)

Extended Data 1

Extended data 1h

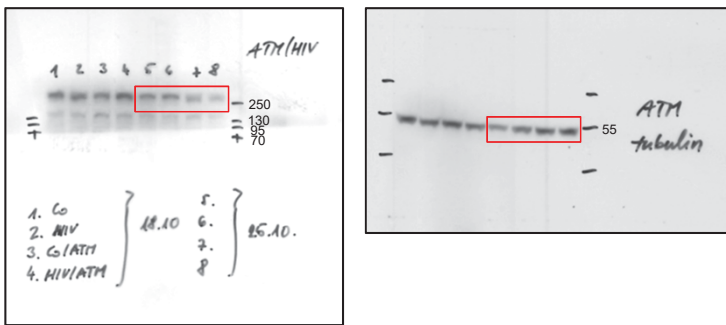

Extended data 1i

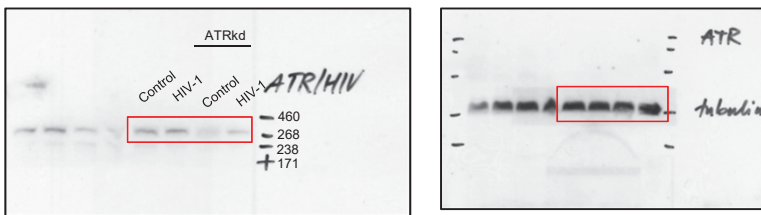

Extended data 1j

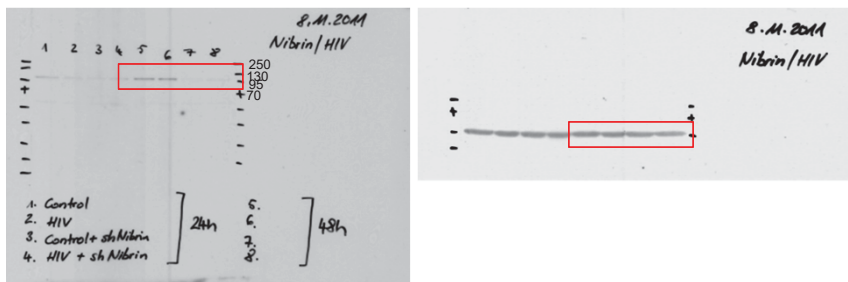

Extended data 1k

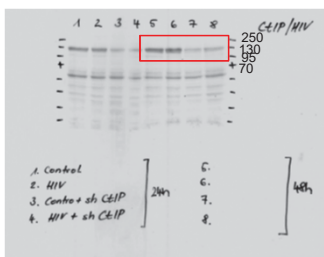

Extended data 1l

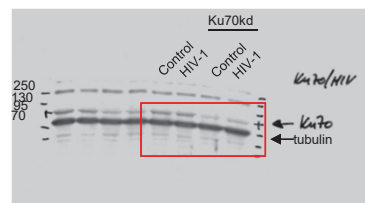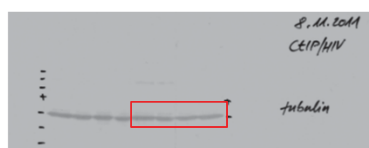

Supplement: EMS118382-supplement-Source_Data_Extended_Data_Fig__1.pdf [file EMS118382-supplement-Source_Data_Extended_Data_Fig__1.pdf]

## Extended Data 2

### Extended data 2a

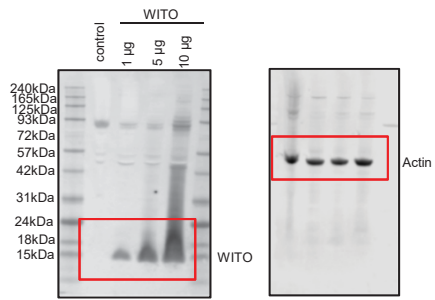

### Extended data 2b

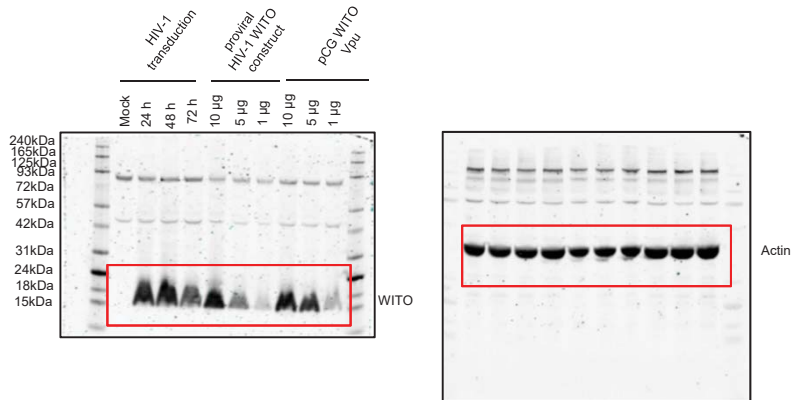

Supplement: EMS118382-supplement-Source_Data_Extended_Data_Fig__2.pdf [file EMS118382-supplement-Source_Data_Extended_Data_Fig__2.pdf]

**Extended Data 3**

**Extended data 3b**

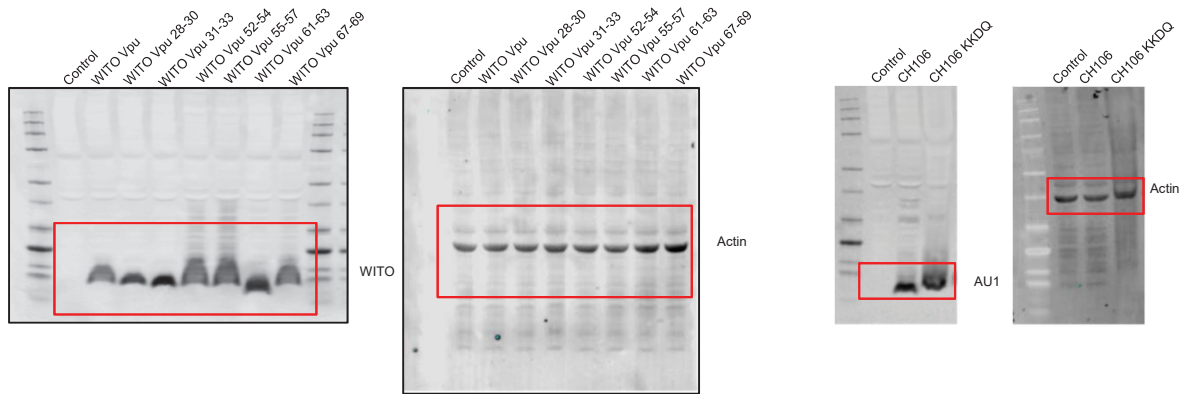

**Extended data 3e**

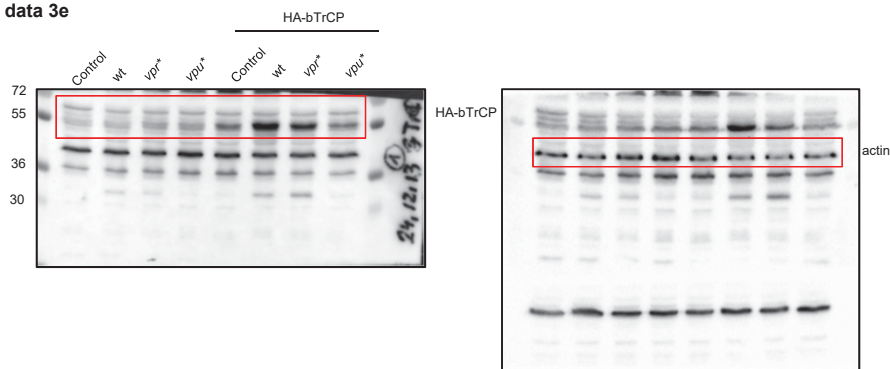

**Extended data 3f**

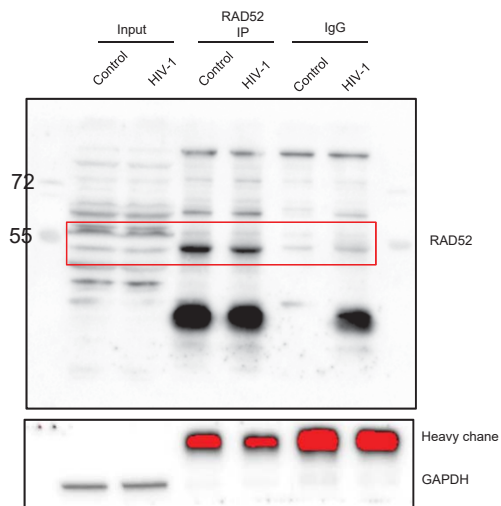

Supplement: EMS118382-supplement-Source_Data_Extended_Data_Fig__3.pdf [file EMS118382-supplement-Source_Data_Extended_Data_Fig__3.pdf]

Extended Data 4

Extended data 4c

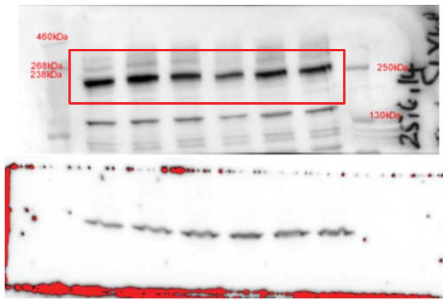

Extended data 4d

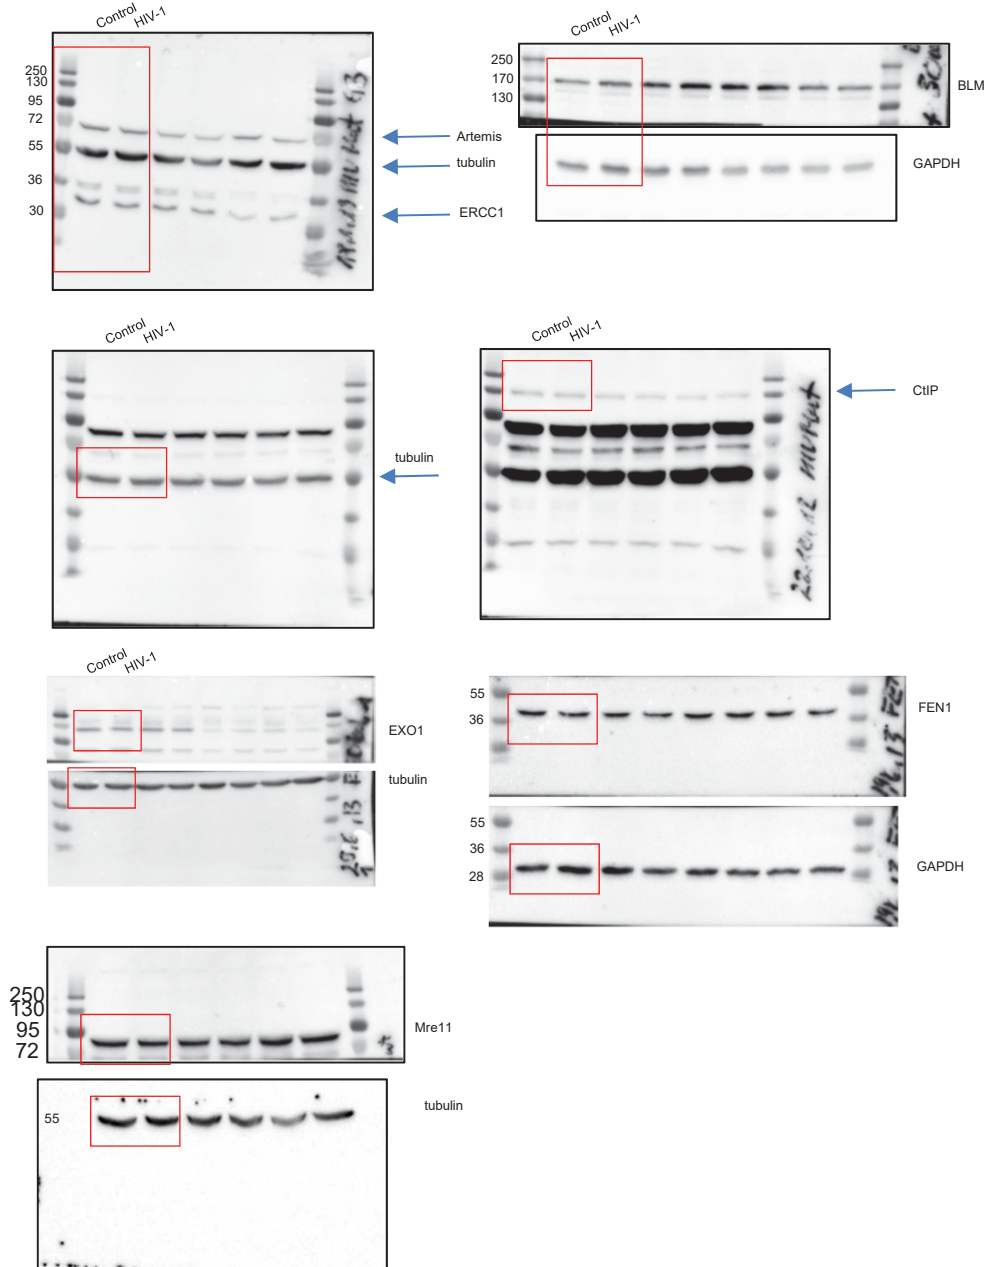

Supplement: EMS118382-supplement-Source_Data_Extended_Data_Fig__4.pdf [file EMS118382-supplement-Source_Data_Extended_Data_Fig__4.pdf]

**Extended Data 5**

**Extended data 5b**

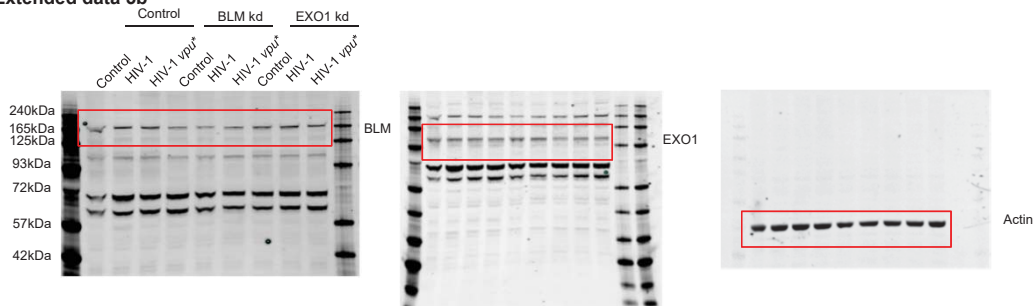

**Extended data 5c**

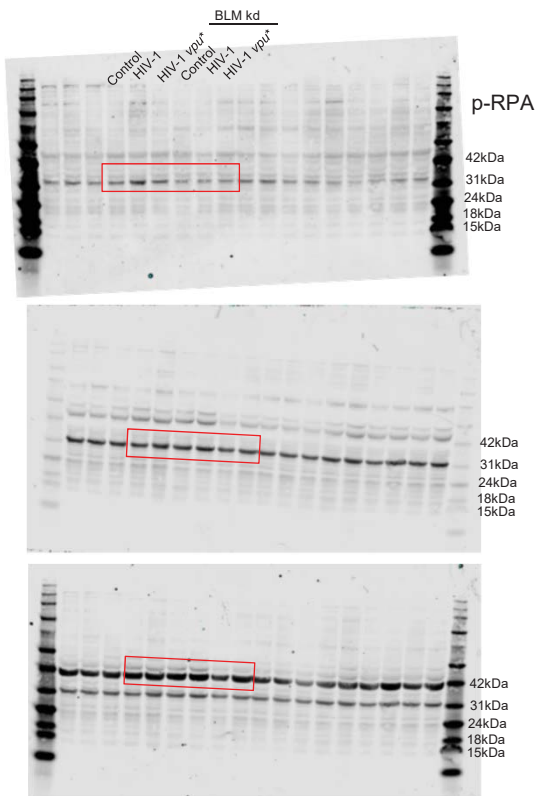

**Extended data 5d**

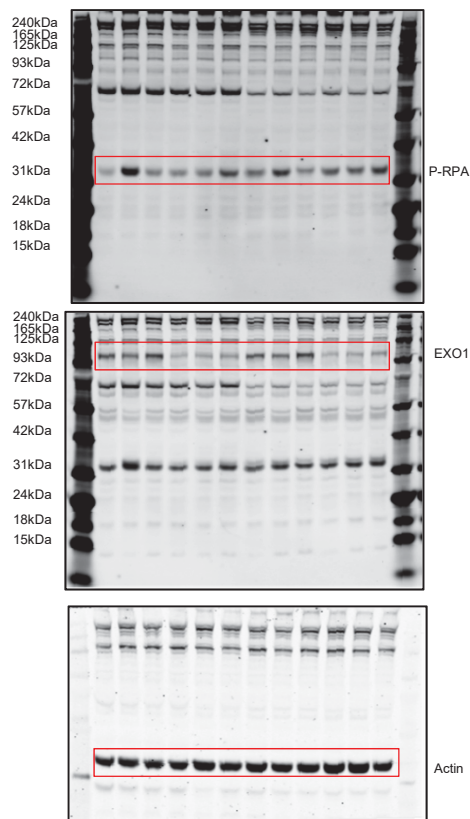

**Extended data 5e**

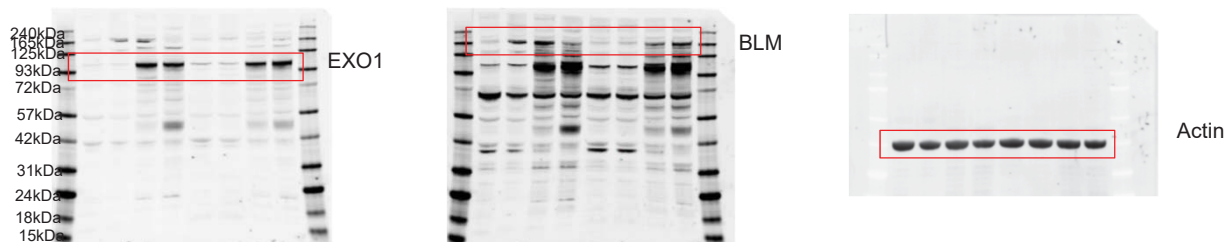

Supplement: EMS118382-supplement-Source_Data_Extended_Data_Fig__5.pdf [file EMS118382-supplement-Source_Data_Extended_Data_Fig__5.pdf]

Extended Data 7

Extended data 7a

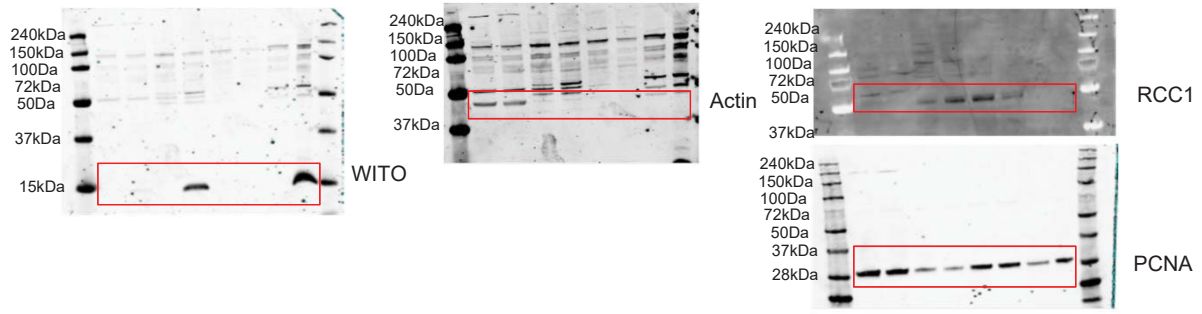

Supplement: EMS118382-supplement-Source_Data_Extended_Data_Fig__7.pdf [file EMS118382-supplement-Source_Data_Extended_Data_Fig__7.pdf]

Extended Data 8

Extended data 8a

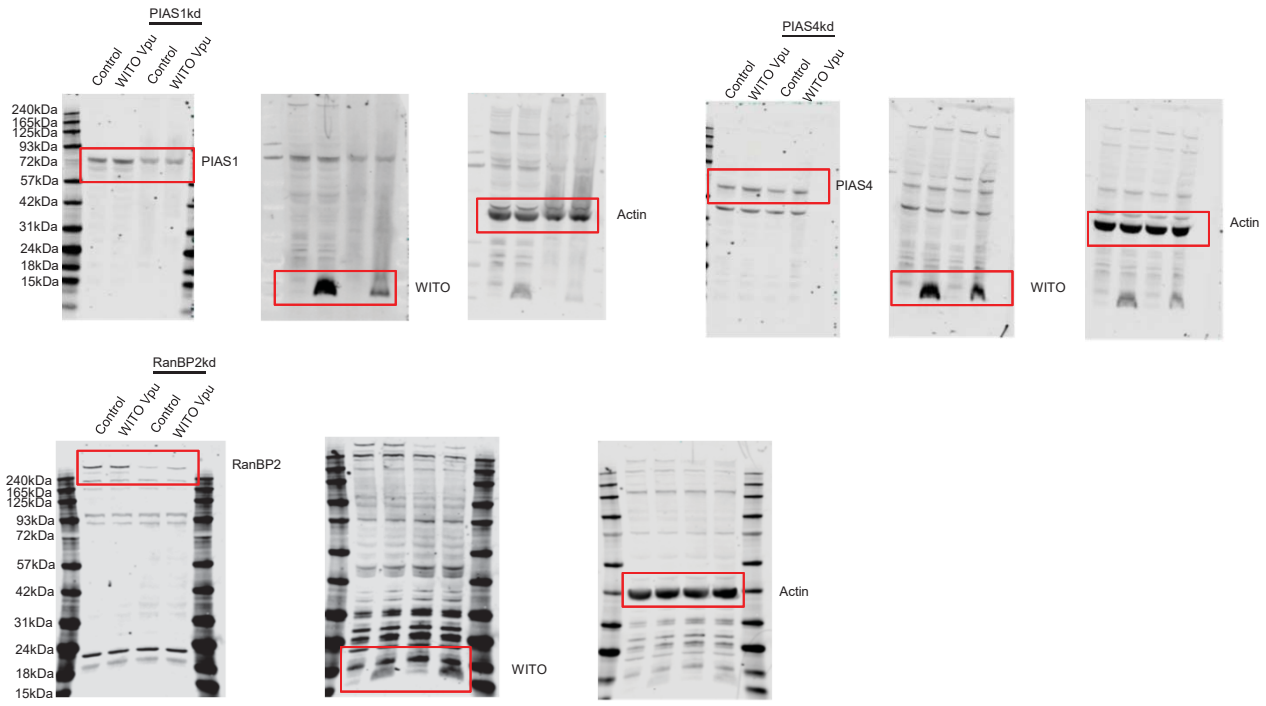

Supplement: EMS118382-supplement-Source_Data_Extended_Data_Fig__8.pdf [file EMS118382-supplement-Source_Data_Extended_Data_Fig__8.pdf]

Extended Data 9

Extended data 9e

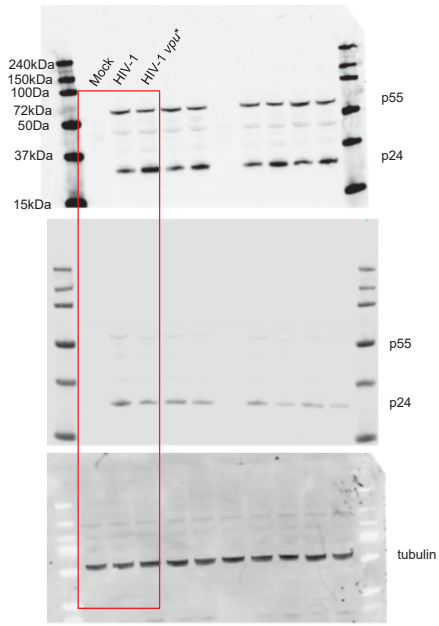

Extended data 9i

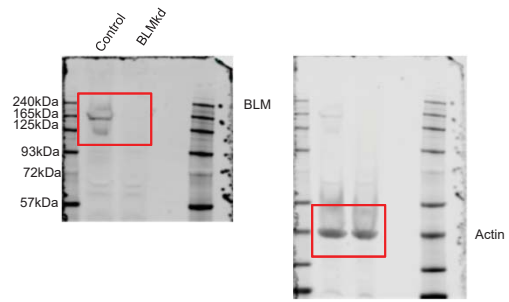

Supplement: EMS118382-supplement-Source_Data_Extended_Data_Fig__9.pdf [file EMS118382-supplement-Source_Data_Extended_Data_Fig__9.pdf]

Source Data Figure 1

Figure 1f

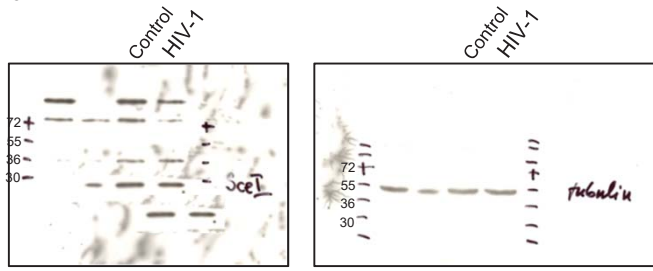

Figure 1h

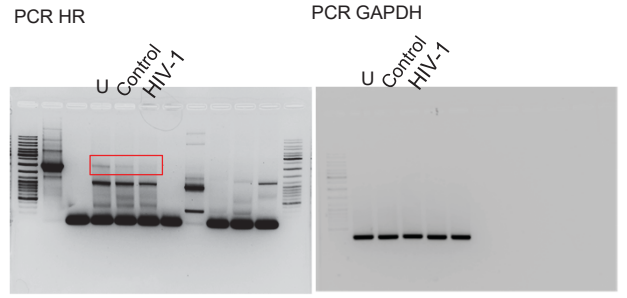

Figure 1i

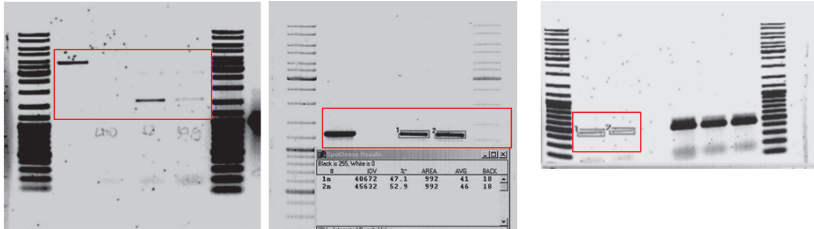

Figure 1j

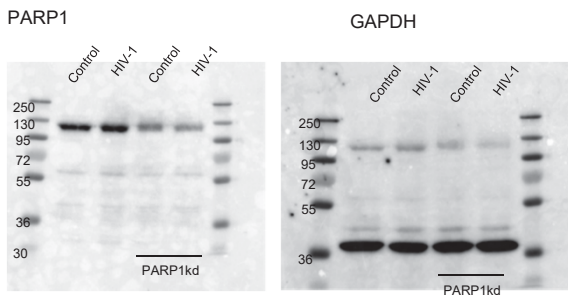

Figure 1k

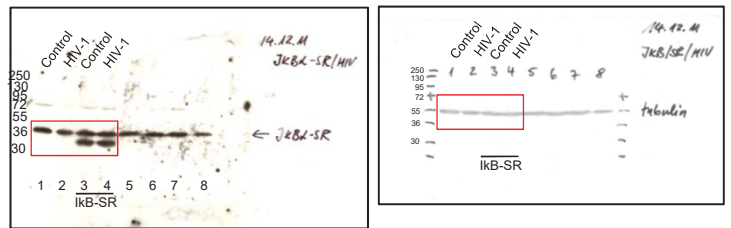

Figure 1l

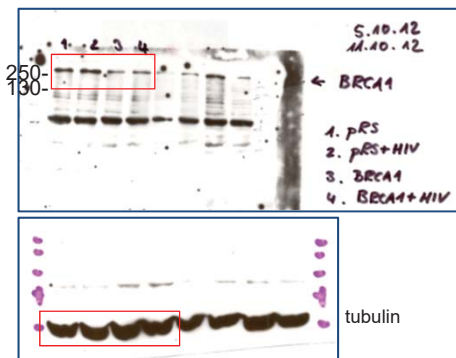

Figure 1m

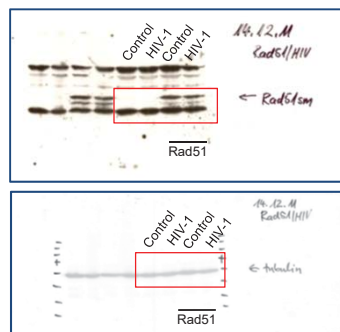

Supplement: EMS118382-supplement-Source_Data_Fig__1.pdf [file EMS118382-supplement-Source_Data_Fig__1.pdf]

Source Data Figure 2

Figure 2e

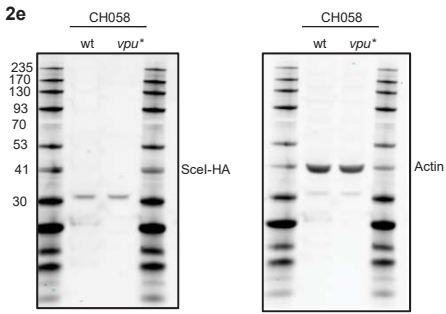

Supplement: EMS118382-supplement-Source_Data_Fig__2.pdf [file EMS118382-supplement-Source_Data_Fig__2.pdf]

Source Data Figure 3

Figure 3c

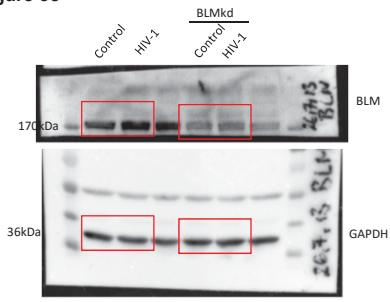

Figure 3d

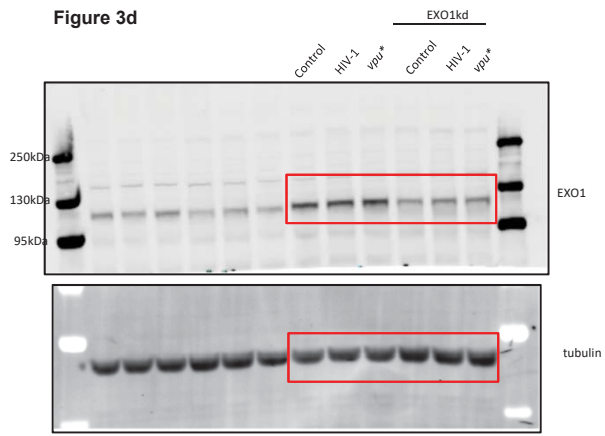

Supplement: EMS118382-supplement-Source_Data_Fig__3.pdf [file EMS118382-supplement-Source_Data_Fig__3.pdf]

Source Data Figure 4

Figure 4b

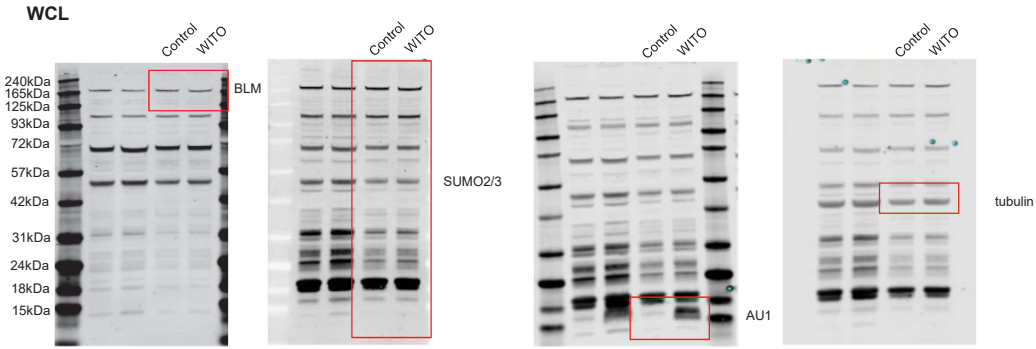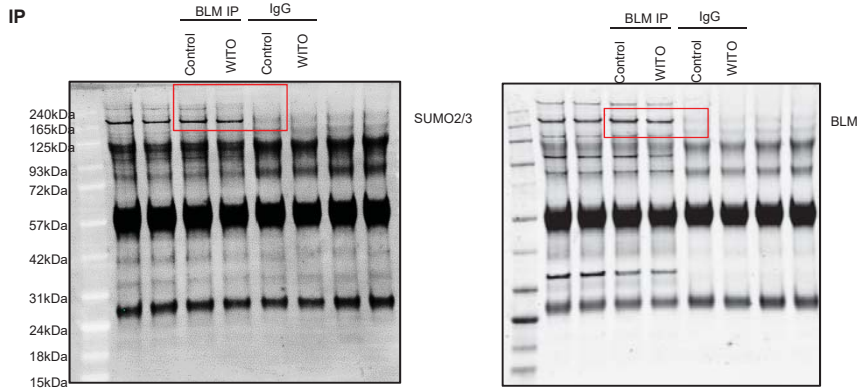

Figure 4d

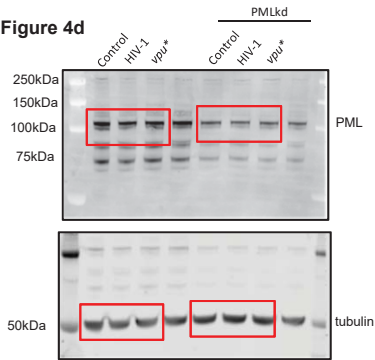

Figure g

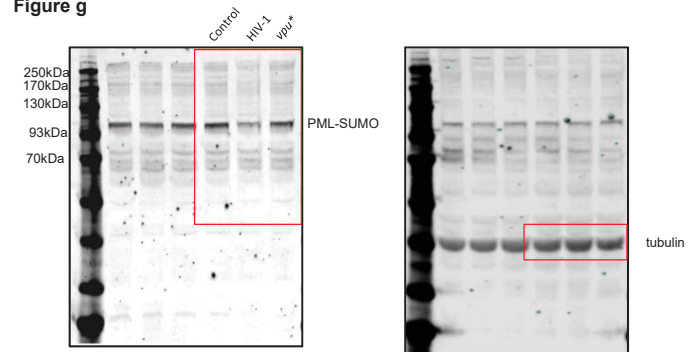

Figure 4h

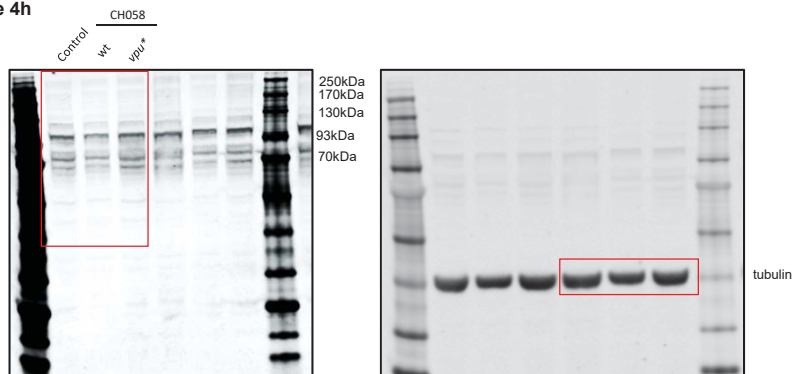

Supplement: EMS118382-supplement-Source_Data_Fig__4.pdf [file EMS118382-supplement-Source_Data_Fig__4.pdf]

Source Data Figure 5

Figure 5a

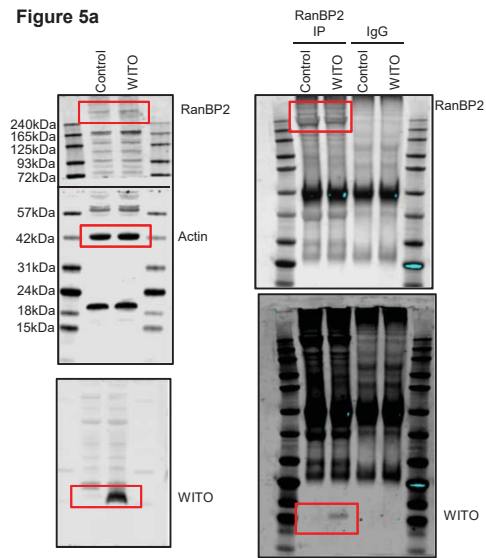

Figure 5f

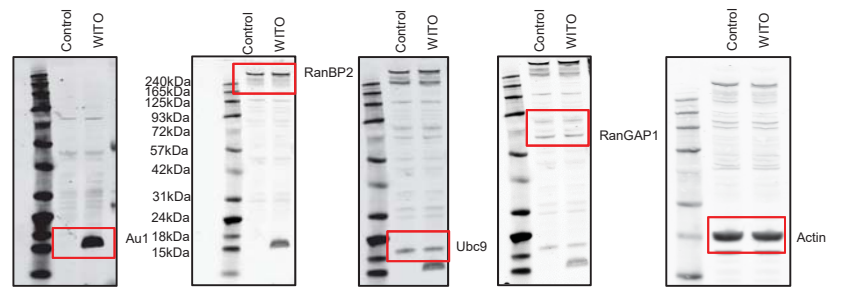

Figure 5g

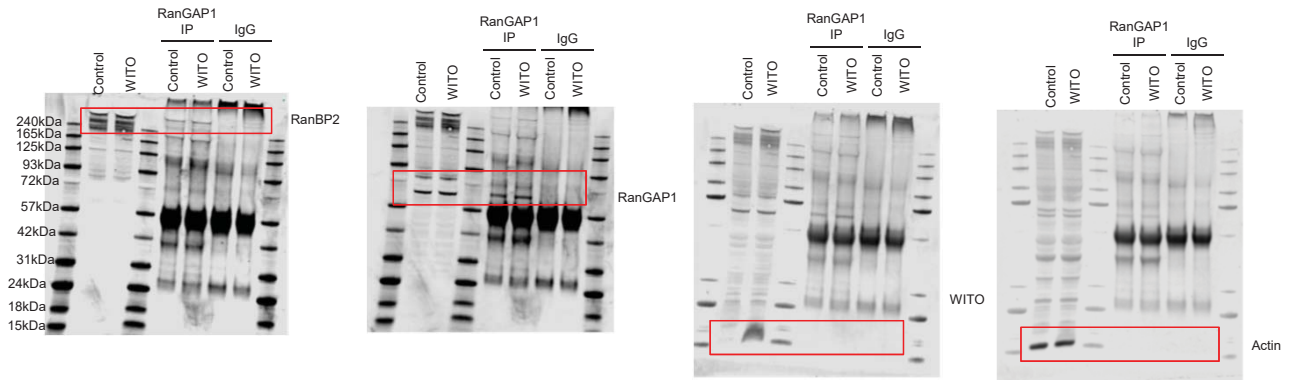

Figure 5h

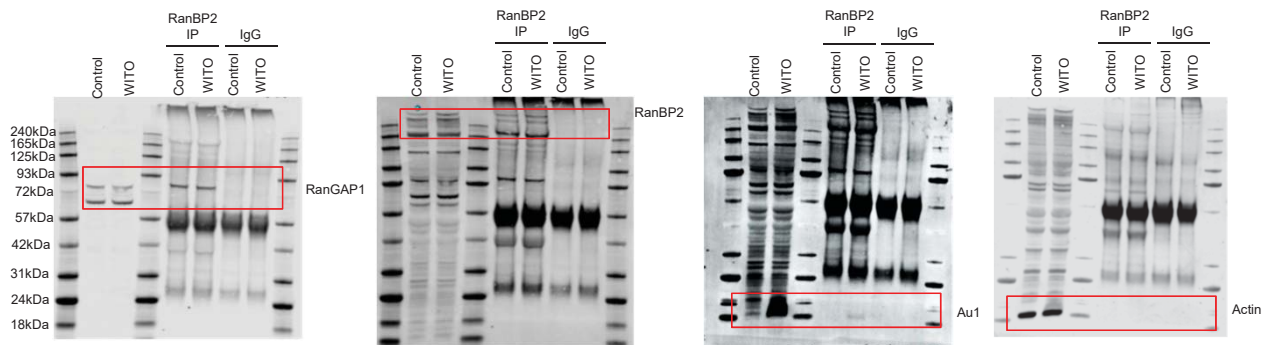

Supplement: EMS118382-supplement-Source_Data_Fig__5.pdf [file EMS118382-supplement-Source_Data_Fig__5.pdf]
